# Supplementary material
Source: publisher figshare collection journal article supplement (https://gsapubs.figshare.com/ndownloader/files/22740785)
Supplement: Supplementary file 1 [file 22740785]

# GSA DATA REPOSITORY

Data Repository Item #: 9707

Title of article Late Cenozoic History and Slip Rates of the Fish Lake Valley,  
Emigrant Peak, and Deep Springs Fault Zones, Nevada and California

Author(s) M. C. Reheis and Thomas L. Sawyer

SEE: ☒ GSA Bulletin  
☐ Geology  
☐ GSA Today

v. 109, p. 280 - 299

Contents

6 pg.

The Geological Society of America  
P.O. Box 9140 • Boulder, CO 80301-9140 U.S.A.  
Phone 303-447-2020

Reheis, M.  
20936

TABLE DR1. MAPPING CRITERIA AND AGE CONTROLS FOR ALLUVIAL-FAN DEPOSITS IN FISH LAKE VALLEY

| Unit name<br>(map symbol)                 | Surface form                                                                                                                                                                                                    | Desert varnish                                                                   | Soil development                                                                                                                                                                                   | Age control*                                                                                                                                                                                                                                                                                                                                                                                                                                                                                                                                                                                                                      |
|-------------------------------------------|-----------------------------------------------------------------------------------------------------------------------------------------------------------------------------------------------------------------|----------------------------------------------------------------------------------|----------------------------------------------------------------------------------------------------------------------------------------------------------------------------------------------------|-----------------------------------------------------------------------------------------------------------------------------------------------------------------------------------------------------------------------------------------------------------------------------------------------------------------------------------------------------------------------------------------------------------------------------------------------------------------------------------------------------------------------------------------------------------------------------------------------------------------------------------|
| Alluvium of<br>Marble<br>Creek (Qtc)      | Unmodified to subdued bar-and-swale and debris-flow topography; little or no pavement.                                                                                                                          | Little (thin spots on clasts) or none                                            | Vesicular A horizon absent or thin and sandy; Bw horizon absent or moderately developed; no CaCO <sub>3</sub> to stage I CaCO <sub>3</sub> .                                                       | Twenty-eight <sup>14</sup> C ages from sites in many drainages range from 0.11 ka to 5.68 ka at depths from 0.2 to 4 m below surface. At more than twenty-six sites in three drainages, contains 0.6- to 3.6-ka tephra layers at depths from 0.3 to 6 m below surface.                                                                                                                                                                                                                                                                                                                                                            |
| Alluvium of<br>Leidy Creek<br>(Qtl)       | Depositional topography preserved on large debris flows; smooth areas of pavement surrounded by rougher pavement; smooth pavement has unsorted interlocking clasts.                                             | Thin but continuous on most clasts; shiny and iridescent in protected sites.     | Continuous, loamy vesicular A horizon, 5-7 cm thick; Bw or weak argillic B horizon--abundant thin clay films; stage II CaCO <sub>3</sub> --stronger in calcareous alluvium.                        | Four <sup>14</sup> C ages from different drainages range from 5.01 to 6.55 ka at depths from 1 to 3.3 m below surface. At Rock Creek (fig. 3), contains <10-ka tephra 6 m below surface. Buried deposits contain the Mazama ash bed (6.85 ka) at two sites near Furnace Creek and one near Leidy Creek. Thermoluminescence ages on buried vesicular A horizons: 7.5±1.0 ka and 11±2 ka (Slate, 1992).                                                                                                                                                                                                                             |
| Alluvium of<br>Indian Creek<br>(Qtl)      | Commonly dissected; well packed and sorted clasts in continuous pavement; prominent soilification treads and risers.                                                                                            | Continuous, thick varnish on most clasts--often shiny and iridescent.            | Continuous, silty vesicular A horizon, 5-10 cm thick; moderate argillic B horizon--abundant thin to moderately thick clay films; stage II-III CaCO <sub>3</sub> --stronger in calcareous alluvium. | Contains 40- to 80-ka tephra at mouth of Leidy Creek, 60- to 80-ka tephra in core at distal end of Leidy Creek fan, and 60- to 100-ka tephra near Rock Creek (fig. 3). Thermoluminescence age on buried vesicular A horizon is >50 ka (Slate, 1992). <sup>36</sup> Cl age on granitic surface boulder near Perry Aiken Creek is ca. 57 ka (Zreda, 1994†). Preliminary <sup>3</sup> He age on olivine from basalt surface boulder near Indian Creek is 125 ka (R. Poreda, oral commun., 1995). <sup>10</sup> Be exposure age on unit Qtl soil profile buried by sediment dated at about 10 ka is >40 ka (Reheis and others, 1996). |
| Alluvium of<br>Trail Canyon<br>(Qtl)      | Commonly deeply dissected; well packed and sorted clasts, including fragments of pedogenic CaCO <sub>3</sub> in continuous pavement where preserved; prominent soilification treads and risers where preserved. | Where preserved, continuous, thick varnish on most clasts--shiny and iridescent. | Continuous, silty A horizon, vesicular at lower elevation; strong argillic horizon--abundant thin to thick clay films; stage III CaCO <sub>3</sub> , 1 m or more thick.                            | Older than 60-100 ka and younger than Bishop ash bed (760 ka) near Rock Creek (fig. 3). Younger than Bishop ash bed northwest of Oasis. Silt layer at Rock Creek has normal polarity (D. Burbank, oral commun., 1991).                                                                                                                                                                                                                                                                                                                                                                                                            |
| Alluvium of<br>McAfee<br>Creek (Qfm)      | Very deeply dissected; relict surface generally not preserved; ridge crests concordant; more stable sites have moderately well packed and sorted pavements with abundant carbonate rubble.                      | Where preserved, locally continuous and thick.                                   | Where preserved, thick silty vesicular A horizon; strong argillic B horizon; Bkm horizon--stage IV laminar CaCO <sub>3</sub> .                                                                     | Overlies and interfingers with Bishop ash bed (760 ka) at six sites in several drainages. Preliminary <sup>3</sup> He age on olivine from basalt surface boulder near Wildhorse Creek is >200 ka (R. Poreda, oral commun., 1995).                                                                                                                                                                                                                                                                                                                                                                                                 |
| Alluvium of<br>Perry Aiken<br>Creek (Qfp) | Very deeply dissected; relict surface not preserved; crops out as lag gravel on top of bedrock                                                                                                                  | Where preserved, locally continuous                                              | No relict soil preserved                                                                                                                                                                           | Older than Bishop ash bed south of mouth of Perry Aiken Creek (fig. 3).                                                                                                                                                                                                                                                                                                                                                                                                                                                                                                                                                           |

Note: Detailed information on dated samples, stratigraphic relations, and sample sites are on maps of Reheis (1991, 1992, 1994) and Reheis and others (1993a, 1995).]

\* Radiocarbon ages were obtained on detrital charcoal and buried logs. Listed ages are not calibrated by dendrochronology.

† Original ages presented by Zreda (1994) in his dissertation were converted by F. Phillips (1997, personal commun.) using new calibration standards of Phillips et al. (1996).

- Zreda, M.G., 1994, Development and calibration of the cosmogenic  $^{36}\text{Cl}$  surface exposure dating method and its application to the chronology of late Quaternary glaciations: Ph.D. dissertation, New Mexico Institute of Mining and Technology, Socorro, 318 p.
- Phillips, F.M., Zreda, M.G., Flinsch, M.R., Elmore, D., and Sharma, P., 1996, A reevaluation of cosmogenic  $^{36}\text{Cl}$  production rates in terrestrial rocks: *Geophysical Research Letters*, v. 23, p. 949-952.

Table DR-2. Calculation of slip rates for the Fish Lake Valley, Emigrant Peak, and Deep Springs fault zones

| Section       | Site | Fault | or fault+ no. @ strike | Site location                    | Offset marker                                        | Amount of offset (m) |        |       | Duration of slip (kyr) |      |       | Slip rate (mm/yr) |       |       |
|---------------|------|-------|------------------------|----------------------------------|------------------------------------------------------|----------------------|--------|-------|------------------------|------|-------|-------------------|-------|-------|
|               |      |       |                        |                                  |                                                      | Min.                 | Max.   | Pref. | Max.                   | Min. | Pref. | Min.              | Max.  | Pref. |
| RIGHT-LATERAL |      |       |                        |                                  |                                                      |                      |        |       |                        |      |       |                   |       |       |
| FLV/FZ        | 1-1' |       |                        | Southern FLV to northern DV      | Jurassic pluton, Precambrian facies, 0.706 Sr line   | 40000                | 100000 | 50000 | 11900                  | 8200 | 10000 | 3.4               | 12.2  | 5.0   |
| FLV/FZ        | 2-2' |       |                        | Northern FLV                     | Width of northern valley; separation of thrust fault | 15000                | 20000  | 20000 | 6900                   | 4000 | 5000  | 2.2               | 5.0   | 4.0   |
| CH            | 3    |       |                        | 800 m southeast of Indian Creek  | Debris-flow levees on surface of unit Qfi*           | 83                   | 165    | 122   | 75                     | 50   | 50    | 1.1               | 3.3   | 2.4   |
| CH            | 3    |       |                        | 100 m southeast of Indian Creek  | Drainage channel on surface of unit Qfi*             | 3                    | 15     | 3     | 7.4                    | 1.9  | 5.0   | 0.4               | 7.9   | 0.6   |
| CH            | 4a   |       |                        | 1200 m northwest of Leidy Creek  | Debris-flow levees on surface of unit Qfi*           | 72                   | 107    | 92    | 75                     | 50   | 50    | 1.0               | 2.1   | 1.8   |
| OA            | 5    |       |                        | Wildhorse Creek to Furnace Creek | Shutteridge of unit Qfi-m--clast lithologies         | 4500                 | 7000   | 5900  | 700                    | 600  | 620   | 6.4               | 11.7  | 9.5   |
| OA            | 6    |       |                        | 800 m southeast of Furnace Creek | Apparent Qfi-Qfi contact normal to faults            | 520                  | 575    | 550   | 190                    | 100  | 130   | 2.7               | 5.8   | 4.2   |
| OA            | 6    |       |                        | 650 m southeast of Furnace Creek | Oldest debris-flow channel, surface of unit Qfi*     | 245                  | 465    | 400   | 130                    | 50   | 100   | 1.9               | 9.3   | 3.1   |
| OA            | 6    |       |                        | 430 m southeast of Furnace Creek | Youngest debris-flow channel, surface of unit Qfi*   | 111                  | 130    | 120   | 75                     | 50   | 50    | 1.5               | 2.6   | 2.4   |
| CU            | 7    |       |                        | Willow Spring area               | Restoration of offset side-canyon fans of unit Qfi*  | 110                  | 180    | 150   | 75                     | 50   | 50    | 1.5               | 3.6   | 3.0   |
| CU            | 8    |       |                        | 1100 m west of Willow Spring     | Offset channel on surface of unit Qfi                | 13                   | 25     | 21    | 8                      | 5    | 6.5   | 1.6               | 5.0   | 3.2   |
| CU            | 9    |       |                        | 700 m south of Willow Spring     | Offset channel on surface of unit Qfi                | 13                   | 32     | 23    | 8                      | 5    | 6.5   | 1.6               | 6.4   | 3.5   |
| VERTICAL      |      |       |                        |                                  |                                                      |                      |        |       |                        |      |       |                   |       |       |
| CH            | 10   |       |                        | 1.7 km north of Indian Creek     | Top of andesite capping Davis Mountain               | 580                  | 1150   | 1000  | 3300                   | 2900 | 3000  | 0.18              | 0.40  | 0.33  |
| CH            | 11   |       |                        | 1.1 km south of Indian Creek     | Top of channel-filling andesite flow                 | 470                  | 1060   | 1000  | 3100                   | 2900 | 3000  | 0.15              | 0.37  | 0.33  |
| CH            | 3    |       |                        | 800 m southeast of Indian Creek  | Debris-flow levees on surface of unit Qfi*           | 27                   | 52     | 40    | 75                     | 50   | 50    | 0.36              | 1.04  | 0.80  |
| CH            | 3    |       |                        | 100 m southeast of Indian Creek  | Drainage channel on surface of unit Qfi*             | 0.7                  | 1.3    | 1.0   | 7.4                    | 1.9  | 5.0   | 0.09              | 0.68  | 0.20  |
| CH            | 4a   |       |                        | 1200 m northwest of Leidy Creek  | Debris-flow levees on surface of unit Qfi*           | 2                    | -12    | 0     | 75                     | 50   | 50    | 0.03              | -0.24 | 0.00  |
| CH            | 4b   |       |                        | 1200 m south of Leidy Creek      | Surface of unit Qfi                                  | 16                   | 32     |       | 75                     | 50   | 50    | 0.21              | 0.64  |       |
| DY            | 12   |       |                        | Headwaters of Toler Creek        | Eroded surface of basalt flow                        | 780                  | 1280   | 1000  | 6900                   | 4000 | 5000  | 0.11              | 0.32  | 0.20  |
| DY            | 13   |       |                        | North side of Perry Aiken Creek  | Eroded surface and deposits of unit Qfi-m            | 135                  | 445    | 210   | 760                    | 760  | 760   | 0.18              | 0.59  | 0.28  |
| DY            | 13   |       |                        | do                               | Surface of unit Qfi                                  | 105                  | 210    |       | 360                    | 190  | 200   | 0.29              | 1.11  |       |
| DY            | 13   |       |                        | do                               | Surface of unit Qfi                                  | 90                   | 180    |       | 75                     | 50   | 50    | 1.20              | 3.60  |       |
| DY            | 14   |       |                        | Mouth of McAfee Creek            | Eroded surface and deposits of unit Qfi-m            | 100                  | 465    | 230   | 760                    | 760  | 760   | 0.13              | 0.61  | 0.30  |
| DY            | 14   |       |                        | do                               | Surface of unit Qfi                                  | 35                   | 70     |       | 75                     | 50   | 50    | 0.47              | 1.40  |       |
| DY            | 14   |       |                        | do                               | Surface of unit Qfi                                  | 13                   | 26     |       | 8                      | 5    | 6.5   | 1.63              | 5.20  |       |

|      |        |                                                             |                                                     |      |      |     |      |      |      |      |      |      |
|------|--------|-------------------------------------------------------------|-----------------------------------------------------|------|------|-----|------|------|------|------|------|------|
| OA   | 15     | West of Furnace Creek                                       | Top of basalt flows projected from the west         | 55   | 490  | 490 | 6900 | 4000 | 5000 | 0.01 | 0.12 | 0.10 |
| OA   | 6      | Mouth of Furnace Creek                                      | Surface of unit Qfi                                 | 15   | 15   | 15  | 75   | 50   | 50   | 0.20 | 0.30 | 0.30 |
| OA   | 16-16' | Top of Chocolate Mountain to base of section at Willow Wash | Top of basalt flows                                 | 670  | 690  | 680 | 6900 | 4000 | 5000 | 0.10 | 0.17 | 0.14 |
| OA   | 17     | 3-4 km west of Oasis                                        | Surface of unit Qfi                                 | 95   | 145  | 120 | 360  | 190  | 200  | 0.26 | 0.76 | 0.60 |
| OA   | 17     | do.                                                         | Surface of unit Qfi                                 | 34   | 65   |     | 75   | 50   | 50   | 0.45 | 1.30 |      |
|      | 18     | 5-10 km southeast of Oasis                                  | Surface of unit Qfi at several localities           | 17   | 50   |     | 75   | 50   | 50   | 0.23 | 1.00 |      |
| EPFZ | 21-21' | 4 km north of Cave Spring Wash                              | Base of unit QTg across all but eastern fault**     | 635  | 800  | 735 | 3400 | 2000 | 2800 | 0.19 | 0.40 | 0.26 |
| EPFZ | 22-22' | Cave Spring Wash                                            | Offset tephra layers across all but eastern fault** | 335  |      | 410 | 2220 | 1920 | 2000 | 0.15 |      | 0.21 |
| EPFZ | 23     | 3 km north of Cave Spring Wash                              | Offset beach deposits across two faults*            | 125  |      |     | 760  | 760  | 760  | 0.16 |      |      |
| EPFZ | 24     | 0.5 km southwest of C.S. Wash                               | Surface of unit Qfi                                 | 30   | 66   |     | 75   | 50   | 50   | 0.40 | 1.32 |      |
| EPFZ | 25     | 0-2 km southwest of C.S. Wash                               | Surface of unit Qfi                                 | 20   | 26   | 22  | 8    | 5    | 6.5  | 2.50 | 5.20 | 3.38 |
| DSFZ | 19     | North end of Deep Springs Valley                            | Eroded top of basalt flows on Chocolate Mtn.        | 715  | 800  | 760 | 6900 | 4000 | 5000 | 0.10 | 0.20 | 0.15 |
| DSFZ | 19     | do.                                                         | Top of Chocolate Mtn. to Bishop-age windgap         | 538  | 538  | 538 | 6140 | 3240 | 4240 | 0.09 | 0.17 | 0.13 |
| DSFZ | 19     | do.                                                         | Wind gap to valley floor                            | 200  | 400  |     | 760  | 760  | 760  | 0.26 | 0.53 |      |
| DSFZ | 20     | Center of Deep Springs Valley                               | Top of footwall ridge to bedrock in hanging wall*   | 1680 | 2020 |     | 6900 | 4000 | 5000 | 0.24 | 0.51 |      |

+ FLVFZ, Fish Lake Valley fault zone: includes CH, Chiatovich Creek section; OA, Oasis section; CU, Cucomongo Canyon section; and DY, Dyer section. DSFZ, Deep Springs fault zone EPFZ, Emigrant Peak fault zone. Surface ages of alluvial fan units Qfm, Qft, Qfi, and Qfi are estimated from data in table 2 of text (DR-1 in repository) and inferred deposition during initiation. @ Site numbers are keyed to circled numbers on several figures in text of paper.

\* Marker is offset across the main active fault strand but not all strands, or is eroded on footwall block, hence gives a minimum rate.

\*\* Base of unit QTg becomes younger to the west, hence values for down-to-the-west offset and slip rates are minimum.

# Table DR-2 #3 of 4

Site

no. Notes

- 1 Stewart (1967), Saleeby and others (1986), 50 km from McKee (1968), 8.2 Ma is min. age of rhyolite near base of unit T<sub>1</sub> in Eureka Valley, 11.9 Ma is max. age of basalt predating onset of motion.
- 2 Maximum age of 6.9 Ma is maximum age of basalt beneath unit T<sub>1</sub> in Eureka Valley, reflecting inferred uplift of hills along Deep Springs fault, 4 Ma is minimum age of landslide unit in Willow Wash, reflecting opening of Fish Lake Valley (Reheis, 1993).
- 3 Estimated surface age of unit Qf<sub>1</sub> from table DR-1 and table 2 in text. Offset measured by EDM theodolite.
- 3 Cal. yrs. B.P. 7.4 ka is maximum age of unit Qf<sub>1</sub> dated at site C-13, 500 m upstream of offset channel, 1.9 is minimum age of unit Qf<sub>1</sub>ce at site C-5, 550 m downstream of offset channel (Reheis and others, 1993a). Offset measured by EDM theodolite.
- 4a Estimated surface age of unit Qf<sub>1</sub> from table DR-1 and table 2 in text. Offset measured by EDM theodolite.
- 5 760 ka is age of Bishop ash interbedded with sediment of unit Qf<sub>1</sub>m at 6 sites, 600 ka is age of maximum extent of glacial oxygen-isotope stage 16, 620 ka is age of the stage 17-16 transition (Williams and others, 1986). Offset measured from maps.
- 6 190 ka is minimum age of Qf<sub>1</sub>, 130 ka is maximum age of Qf<sub>1</sub>. Offset measured from topographic maps and air photos.
- 6 For preferred slip rate, use maximum age of Qf<sub>1</sub> because the slip is based on the oldest channel. Offset measured by tape.
- 6 Preferred slip duration is 50 ka because offset channel is youngest of several on unit Qf<sub>1</sub> surface. Offset measured by tape.
- 7 Preferred slip duration is 100 ka because offset channel is oldest of several on unit Qf<sub>1</sub> surface. Offset measured by tape.
- 8 Offset measured by tape.
- 9 Offset measured by tape.
- 10 Minimum offset from projecting eastward slope of top of andesite (95 m/km) to range front; maximum includes estimated depth of alluvium from bedrock projections and well logs. Age range of most dated samples of andesite of Davis Mountain (table 1).
- 11 Minimum offset from projecting gradient of Indian Creek (79 m/km) from hill 7917T to range front; maximum adds estimated depth of alluvium from bedrock projections and well logs. Age range of andesite dated at this site (table 1 of ms., KA-6, -7, -23).
- 3 Minimum offset because not all faults are included. Measured by EDM theodolite.
- 3 Minimum offset because not all faults are included. Measured by EDM theodolite.
- 4a Minimum offset because not all faults are included; offset is antithetic. Measured by EDM theodolite.
- 4b Scarp height measured by Jacob staff.
- 12 Minimum offset from projecting 11-Ma basalt east to range front at gradient of remnant 95 m/km to elev. 2377, actual 1598; maximum offset from estimated depth to bedrock of 3600' (1098m). Age estimates as for site 2.
- 13 Minimum offset from difference in height of units Qf<sub>1</sub>m and Qf<sub>1</sub> west of faults plus minimum offset of unit Qf<sub>1</sub> (Reheis and others, 1994); maximum offset is projected elevation of Qf<sub>1</sub>m at range front (gradient of modern creek) minus shoreline elev.
- 13 Minimum offset from offset of unit Qf<sub>1</sub> plus additional scarp height on unit Qf<sub>1</sub>; depth of burial east of faults unknown. Scarp height measured by Jacob staff.
- 13 Minimum offset includes offsets of unit Qf<sub>1</sub> across two small faults plus scarp height of eastern fault; depth of burial east of faults unknown. Scarp height measured by Jacob staff.
- 14 Minimum offset from elevation of lacustrine? Bishop ash bed above valley floor at range front plus offset across western fault; maximum offset includes depth to estimated pluvial-lake shoreline elevation (1460 m).
- 14 Depth of burial on east side of faults is unknown. Scarp height measured by Jacob staff.
- 14 Depth of burial on east side of faults is unknown. Scarp height measured by Jacob staff.

Table DR-2 pg 4 of 4

15 Offsets are range of estimated depths from projected elevation of basalt flows at range front (eastward slope of 135 m/km on unfaulted flows to the west) to bedrock beneath valley alluvium. Age estimates as for site 2.

6 Scarp height measured by Jacob staff.

16 Offsets are difference in elevation from top of Chocolate Mountain to estimated depth of bedrock beneath valley floor of Fish Lake Valley. Age estimates as for site 2.

17 Offsets are calculated from backtitled beds within unit Qlt between the main fault strands. Ages assume unit Qlt was deposited in isotope stages 11 to 7 (commonly contains two buried soils), stage boundaries from Williams et al. (1988).

17 Offset: includes that measured across western fault and the scarp height at the eastern fault; depth of burial on the east is unknown. Scarp heights measured by Jacob staff.

18 Offset range is derived from several different sites; depth of burial unknown. Scarp heights measured by Jacob staff.

21 Offset is minimum cumulative; base of Q1g is at 6080' at S.P. range front and is deeper than 3150' in drill hole FLH-34 on west side of faults; excludes offset on range-front fault. Ages from tephrochronology.

22 Offset is minimum cumulative; western 2 faults offset Bishop shoreline 125 m + 75-130m to TTC at 147-CS; central fault has 95 m offset minimum using thickness of strata below GM ash and above TTC ash; eastern fault offset is 35-60 m from projections.

23 Offset is from highest elevation of Bishop-ash beach sand on footwall to elevation of shoreline from sinter mound on hanging wall 6.5 km to west; does not include faults to east.

24 Depth of burial is unknown. Scarp heights measured using Jacob staff.

25 Measured across a graben using Jacob staff.

19 Offset is the difference in elevation from top of Chocolate Mountain to floor of Deep Springs Valley; basalt cropping out to N has gradient of 102 m/km, proj. elev. 1590 m at surf. elev. of 1635 m. Age estimates as for site 2.

19 Offset is the difference in elevation from top of Chocolate Mountain to Bishop ash and stream gravel in wind gap. Stream-gravel lag is strewn down the slope, suggesting progressive side-slipping during faulting. Ages as for site 2 and of Bishop ash.

19 Minimum offset because depth of burial is unknown.

20 Offset is minimum due to erosion of footwall: difference in elevation from the highest point on the footwall block to bedrock below alluvium in the hanging wall, about 790 m from gravity data (Wilson, 1975). Age estimates as for site 2.

glacial periods (Reheis and others, 1996).
